1 **Adaptive shifts in gene regulation underlie a developmental delay in thermogenesis in high-**  
2 **altitude deer mice**

3 Jonathan P. Velotta<sup>1</sup>, Cayleih E. Robertson<sup>2</sup>, Rena M. Schweizer<sup>1</sup>, Grant B. McClelland<sup>2</sup>, and  
4 Zachary A. Cheviron<sup>1</sup>

5 <sup>1</sup>Division of Biological Sciences, University of Montana, 32 Campus Drive, Missoula, MT  
6 59812

7 <sup>2</sup>Department of Biology, McMaster University, 1280 Main Street West, Hamilton, ON, Canada,  
8 L8S 4K1

## 9 Abstract

10 Aerobic performance is tied to fitness as it influences an animal's ability to find food,  
11 escape predators, or survive extreme conditions. At high altitude, where low O<sub>2</sub> availability and  
12 persistent cold prevail, maximum metabolic heat production (thermogenesis) is an aerobic  
13 performance trait that is intimately linked to survival. Understanding how thermogenesis evolves  
14 to enhance survival at high altitude will yield insight into the links between physiology,  
15 performance, and fitness. Recent work in deer mice (*Peromyscus maniculatus*) has shown that  
16 adult mice native to high-altitude have higher thermogenic capacities under hypoxia compared to  
17 lowland conspecifics, but developing high-altitude pups delay the onset of thermogenesis. This  
18 suggests that natural selection on thermogenic capacity varies across life stages. To determine  
19 the mechanistic cause of this ontogenetic delay, we analyzed the transcriptomes of thermo-  
20 effector organs - brown adipose tissue and skeletal muscle – in developing deer mice native to  
21 low- and high-altitude. We demonstrate that the developmental delay in thermogenesis is  
22 associated with adaptive shifts in the expression of genes involved in nervous system  
23 development, fuel/O<sub>2</sub> supply, and oxidative metabolism gene pathways. Our results demonstrate  
24 that selection has modified the developmental trajectory of the thermoregulatory system at high  
25 altitude and has done so by acting on the regulatory systems that control the maturation of  
26 thermo-effector tissues. We suggest that the cold and hypoxic conditions of high altitude may  
27 force a resource allocation trade-off, whereby limited energy is allocated to developmental  
28 processes such as growth, versus active thermogenesis during early development.

## 29 **Introduction**

30 Fitness in the wild is determined by suites of interacting traits that influence variation in  
31 whole-organism performance. This is because performance determines an organism's ability to  
32 conduct ecologically-relevant tasks such as avoiding predators, competing for resources, and  
33 surviving extreme events (Huey and Stevenson 1979; Garland and Losos 1994; Irschick and  
34 Garland 2001; Irschick et al. 2008; Campbell-Staton et al. 2017). Many of these ecologically-  
35 relevant tasks that impinge on whole-organism performance are ultimately dependent upon the  
36 capacity for aerobic metabolism, and thus, the ability to transport and utilize O<sub>2</sub>. As such, the  
37 development of the physiological machinery needed to delivery O<sub>2</sub> and metabolize fuels is  
38 intimately tied to both postnatal juvenile survival and the future reproductive success as adults.  
39 The timing of key developmental events, and responses to early environmental exposures, should  
40 therefore influence the evolution of whole-organism performance (Lailvaux and Husak 2014).  
41 Studies that seek to understand how performance evolves in the context of development are rare  
42 but are needed to determine the causal connections between phenotype and fitness in the wild.

43 Extreme environments, such as high-altitude habitats > 3,000 meters above sea level  
44 (a.s.l. Bouverot 1985), are windows into the mechanisms that shape adaptive variation in  
45 performance, since the selection pressures are few in number and strong in magnitude (Garland  
46 and Carter 1994). The agents of selection at high altitude - cold temperature and unavoidable  
47 reductions in available O<sub>2</sub> (hypobaric hypoxia) - have led to clear examples of local adaptation in  
48 animals that live there permanently (e.g., Beall 2007; Storz et al. 2010; Simonson et al. 2011). A  
49 considerable amount of recent work on high-altitude adaptation has been conducted on the North  
50 American deer mouse (*Peromyscus maniculatus*) owing to its broad altitudinal distribution,  
51 ranging from sea level to >4,000 m a.s.l. (King 1968). Recent comparative physiological work  
52 demonstrates that adult high-altitude deer mice from the Colorado Rocky Mountains have  
53 consistently higher aerobic performance capabilities than conspecifics in the Great Plains: high-  
54 altitude deer mice are capable of greater aerobic performance under hypoxia and in response to  
55 extreme cold (referred to as thermogenic capacity) measured in the wild and in the laboratory  
56 (Cheviron et al. 2012; Cheviron et al. 2013; Cheviron et al. 2014; Lui et al. 2015; Lau et al.  
57 2017; Tate et al. 2017). Capture-mark-recapture data confirm that higher thermogenic capacities  
58 are beneficial for survival at high-altitude (Hayes and O'Connor 1999). Available data suggests

59 that enhanced thermogenic capacity provides an important performance benefit in high-altitude  
60 deer mice that is strongly tied to fitness during adulthood.

61         Recent work has uncovered the factors that shape adaptive variation in thermogenic  
62 performance to illuminate links between physiology and fitness. This work, conducted in adult  
63 deer mice, suggests that improved thermogenic performance is related to alterations to O<sub>2</sub>  
64 transport and utilization, including more effective breathing patterns (Ivy and Scott 2017), higher  
65 blood-O<sub>2</sub> affinity (Snyder 1981; Snyder et al. 1982; Chappell and Snyder 1984; Storz 2007;  
66 Storz 2016) and circulation (Tate et al. 2017), an improved capacity to oxidize lipids as fuel  
67 (Cheviron et al. 2012; Cheviron et al. 2014), and a greater oxidative capacity in skeletal muscles  
68 and their mitochondria (Lui et al. 2015; Scott et al. 2015; Mahalingam et al. 2017). Despite the  
69 importance of these changes in adults, it is not clear how high-altitude animals have evolved to  
70 survive the unique challenges of cold and hypoxic stress during development. Early post-natal  
71 development, however, is critically linked to fitness: altricial rodent pups are small, immobile,  
72 and reliant on limited energy supplied through maternal care, and pup mortality can be extremely  
73 high in the wild (Hill 1983). Moreover, mouse pups are not born with the ability to generate heat  
74 (Pembrey 1895). Independent thermogenic abilities develop as a result of the maturation of  
75 thermo-effector organs, brown adipose tissue (BAT) and skeletal muscle, which permits non-  
76 shivering and shivering thermogenesis, respectively (Lagerspetz 1966; Arjamaa and Lagerspetz  
77 1979). It follows that if selection pressures on thermogenic performance are constant across  
78 life stages, then thermogenesis should develop faster in high-altitude pups to support an  
79 improved adult performance.

80         Robertson et al. (2019) however have recently demonstrated that non-shivering  
81 thermogenesis (NST) is delayed by approximately 2-days in high-altitude deer mouse pups  
82 compared to lowland conspecifics and a closely related, but strictly lowland species, *P. leucopus*.  
83 This delay in the onset of NST is also further associated with a delay in the onset of shivering  
84 thermogenesis until the normal date of weaning (Robertson and McClelland 2019; Fig. 1). The  
85 authors suggest that the observed ontogenetic delay may be an evolutionary response to  
86 limitations in energy production or allocation at high altitude (*e.g.*, as a result of low O<sub>2</sub>), which  
87 force a trade-off between active thermogenesis vs. other developmental functions such as  
88 growth. Consistent with this interpretation, growth rates under common conditions are identical

89 between low- and high-altitude pups, despite the fact that high-altitude mothers produce larger  
90 litters (Robertson et al. 2019).

91 We tested the hypothesis that the ontogenetic delay in thermogenesis is driven by  
92 regulatory changes that delay the development of the primary thermo-effector organs. To do this,  
93 we compared BAT and skeletal muscle transcriptomes in deer mice native to low and high  
94 altitudes across the first 27 days of life. We associated variation in transcript abundances to  
95 variation in thermogenic capabilities using a gene co-expression network approach that has been  
96 used to link gene regulation to physiological function in variety of evolutionary contexts  
97 (Whitehead 2012; Cheviron et al. 2014; DeBiase and Kelly 2016; Velotta et al. 2017; Campbell-  
98 Staton et al. 2018). We show that the delay in thermogenesis in high-altitude mice is associated  
99 with a delay in the expression of gene networks that function in nervous system control of, and  
100 fuel/O<sub>2</sub> supply to, BAT, as well as aerobic metabolism and mitochondrial biogenesis in skeletal  
101 muscle. Finally, using a combination of phenotypic divergence and population-genetic  
102 approaches, we provide evidence that the ontogenetic delays in thermogenesis and their  
103 associated regulatory changes are adaptive at high altitude. By combining these approaches, we  
104 demonstrate, for the first time, that selection has altered the developmental trajectories of a  
105 thermoregulatory system by acting on the regulatory control of thermo-effector organ phenotype.

## 106 **Results**

### 107 *The ontogeny of thermogenesis*

108 We reanalyzed cold-induced metabolic rate data (rates of O<sub>2</sub> consumption, VO<sub>2</sub>) from  
109 Robertson et al. (2019) and Robertson and McClelland (2019) to assess the ontogeny of  
110 thermogenesis in deer mice native to lowland (320 m a.s.l) and highland (4,350 m a.s.l) habitats.  
111 VO<sub>2</sub> of pups post-natal age p0-p10 was measured during exposure to a mild cold stressor (24°C),  
112 and was calculated as the difference in cold-induced VO<sub>2</sub> compared to that of normothermic  
113 (30°C) littermates (see Materials and Methods). VO<sub>2</sub> in these young pups was ~0 until p6 for  
114 highlanders and lowlanders (Fig. 1A). After p6, cold-induced VO<sub>2</sub> increased in both populations,  
115 but did so at a slower rate in highlanders (Fig. 1). Statistically significant population differences  
116 in VO<sub>2</sub> were detected at p4 and p10 (Fig. 1). We measured thermogenic capacity in older pups  
117 (age p14, p21 and p27) as VO<sub>2</sub>-max during exposure to cold (4°C) in a heliox air mixture.  
118 Highland deer mice exhibited a significantly reduced thermogenic capacity at p14 compared to

119 lowlanders (~6 ml O<sub>2</sub> per gram per hour, on average), whereas by p21 thermogenic capacities  
120 between populations were nearly equivalent (Fig. 1B). Although there is a trend towards  
121 highlanders surpassing lowlanders by p27, this result was not significant ( $p=0.2$ ).

## 122 *Transcriptional correlates of thermogenesis*

123 We sequenced the transcriptomes of thermo-effector organs, brown adipose tissue (BAT)  
124 and skeletal muscle, in order to assess regulatory mechanisms underlying evolutionary changes  
125 in the ontogeny of thermogenesis at high-altitude. Principal components analysis (PCA) of  
126 transcriptome-wide patterns of gene expression revealed separation between lowlanders and  
127 highlanders, and across ontogeny, in BAT and skeletal muscle (Fig. 2). For BAT, highlanders  
128 and lowlanders were distinguishable along PC1, which explained 12% of total variation in  
129 expression. By contrast, PC2, which explained 10% of the variance, distinguished post-natal age  
130 (Fig. 2A). We observed similar separations in muscle samples, although in this case populations  
131 were distinguishable along PC1 (20% variance), and post-natal age distinguishable along PC2  
132 (10% of variance). 95% confidence ellipses were drawn around each population demonstrating  
133 that populations were entirely (skeletal muscle, Fig 2B) or almost entirely (BAT Fig. 2A) non-  
134 overlapping in PC1 and PC2 space.

135 Weighted gene co-expression network analysis (WGCNA) of BAT samples across p0-  
136 p10 yielded 38 modules ranging in size from 61 to 1,073 genes (See Supplemental Table S2 for a  
137 full list of module assignments). A total of 1,588 out of 11,192 genes could not be assigned to  
138 any module (Module B0). We found ten modules exhibiting statistically significant associations  
139 between module eigengene and cold-induced VO<sub>2</sub>, after correction for multiple testing (Table 1).  
140 Of the ten VO<sub>2</sub>-associated modules, six exhibited significant population effects on module  
141 eigengene (Table 1). Two of these (modules B11 and B35) were not significantly enriched for  
142 GO terms or were enriched for terms unrelated to thermogenesis (e.g., “drug metabolism”; see  
143 Table S4 for the full list of enriched terms). Modules B4 and B12 (Table 1) were both  
144 significantly enriched for genes that encode ribosomal proteins (Supplemental Table S4), which  
145 may indicate differences in protein translation between populations. No significant interaction  
146 effects were detected for any VO<sub>2</sub>-associated module (Table 1).

147 Modules B3 and B36, by contrast, were positively associated with cold-induced VO<sub>2</sub>  
148 (Fig. 3A-B), expressed at significantly lower levels in highlanders across development (Fig. 3B-

149 C), and exhibited significant enrichment for functions that reflect a delay in the development of  
150 BAT in highlanders (Fig. 3E-F). Module B3 was enriched for functional terms related to fatty  
151 acid metabolism in the mitochondria, including the GO Biological Process term “fatty acid  
152 metabolic process”, the GO Cellular Component term “mitochondrion,” the KEGG pathway  
153 “fatty acid degradation (Fig. 3E), and Reactome and WikiPathways terms “fatty acid  
154 metabolism” and “fatty acid beta oxidation (Supplementary Table S4).” Module B36 was  
155 enriched for terms related to the vascularization of BAT and the development of its neural  
156 circuitry (Fig. 3F): vascularization terms include the GO Biological Processes “blood vessel  
157 development” and “vasculature development,” as well as the KEGG pathway “VEGF signaling,”  
158 which is the major pathway regulating new blood vessel growth. Indeed, *Vegfa* exhibits  
159 significantly lowered expression in highland compared to lowland mice (Fig. 3F inset), though it  
160 was not assigned to module B36 (Supplemental Table S2). Finally, we detected enrichment of  
161 the KEGG pathway “axon guidance,” which represents a key stage in the development of  
162 neuronal networks. Fig. 3B-C reveal that expression values for both of these modules increased  
163 from birth to post-natal day 10, and that expression was consistently higher among lowlanders at  
164 nearly every time point ( $p < 0.001$  population effect for both modules).

165 We performed WGCNA on skeletal muscle transcriptomes from lowland and highland  
166 deer mice sampled at postnatal days 14, 21, and 27. WGCNA identified seven modules ranging  
167 in size from 92 to 2,878 genes (Table 2). A total of 3,529 out of 11,104 genes could not be  
168 assigned to any module (M0; Supplemental Table S2). Although individual-level thermogenic  
169 capacity data do not exist for the samples sequenced, we did detect significant correlations  
170 between module eigengene and thermogenic capacity at the level of population and age for two  
171 modules, M2 ( $r = -0.94$ ;  $p = 0.006$ ) and M6 ( $r = 0.98$ ;  $p < 0.001$ ; Fig. 4A; Table 2). Although we  
172 detected an overall effect of postnatal age, but not population, on both of these modules (Table  
173 2), expression followed a pattern that closely resembled population-level variation in  
174 thermogenic capacity. For module M6 in particular, as with thermogenic capacity (Fig 1B),  
175 expression was lower in highland compared to lowland deer mice at p14 ( $F_{1,4} = 27.7$ ;  $p = 0.006$ ),  
176 but no different from lowlanders at p21 or p27 ( $p > 0.05$ ; Fig. 4B). The opposite was true of M2,  
177 whereby module expression at p14 was significantly higher in high-altitude mice ( $F_{1,4} = 27.7$ ;  
178  $p = 0.02$ ).



179 Functional enrichment analysis of VO<sub>2</sub>-associated skeletal muscle modules revealed  
180 enrichment of a wide variety of biological functions (Supplemental Table S4). Module M2 for  
181 example was enriched for pathways that function in the development of muscle blood supply,  
182 including the GO Biological Process terms “angiogenesis, blood vessel morphogenesis, and  
183 vasculogenesis.” This result may reflect an initiation of blood vessel development that eventually  
184 leads to a greater production of capillaries in highlanders by p21 (Robertson and McClelland  
185 2019). Indeed, along with a greater proportion of oxidative fiber types, increased capillary  
186 density is thought to be an adaptive advantage at high-altitude that contributes to improved  
187 aerobic performance capabilities in adult mice (Lui et al. 2015; Scott et al. 2015; Nikel et al.  
188 2018).

189 By contrast to M2, module M6 was enriched for functions related to energy metabolism  
190 and the generation of ATP, and thermogenesis, including the KEGG terms “oxidative  
191 phosphorylation, thermogenesis, citrate cycle, and glycolysis/gluconeogenesis (Fig. 4C).”  
192 Enrichment of the GO Cellular Component terms “NADH dehydrogenase complex and  
193 mitochondrial respiratory chain complex I” indicates that energy metabolism functions are  
194 related to changes in the production of NADH:ubiquinone oxidoreductase/mitochondrial  
195 complex I, the first protein complex in the electron transport chain. We also detected significant  
196 enrichment of transcription factor binding sites for estrogen-related receptor alpha, ERR1 (Table  
197 S4; *Esrra* in the *Peromyscus* genome), which is a major regulator of mitochondrial biogenesis,  
198 gluconeogenesis, oxidative phosphorylation, and gluconeogenesis. Indeed, the *Esrra* gene itself  
199 was assigned to module M6 and its expression at p14 is strongly downregulated in highlanders  
200 relative to lowlanders (Fig. 4D). Detection of *Ppara* (peroxisome proliferator activated receptor  
201 alpha) in module M6 (Fig. 4E) suggests that fatty acid oxidation may also be depressed in  
202 highlanders, since this gene is a major regulator of fat metabolism in muscle (Issemann and  
203 Green 1990).

#### 204 *Evidence of selection on candidate transcriptional modules*

205 Among the transcriptional modules identified by WGCNA, three (B3, B36, M6) were  
206 significantly and positively associated with variation in VO<sub>2</sub>. These modules thus represent  
207 candidate pathways underlying the delay in thermogenesis in high-altitude mice. We took a two-  
208 pronged approach to determining whether developmental delays in candidate module expression



209 are adaptive at high-altitude. First, we calculated  $P_{ST}$  (an estimate of phenotypic differentiation  
210 following Brommer 2011) on module eigengene values of candidate modules to test whether  
211 divergence between lowland and highland populations exceeded neutral expectations as set by  
212  $F_{ST}$  (an estimate of neutral genetic differentiation). For BAT modules B3 and B36,  $P_{ST}$  exceeded  
213  $F_{ST}$  at nearly all values of  $c/h^2$  (Fig. 5A-B);  $c/h^2$  represents the unknown degree to which  
214 phenotypes are due to additive genetic effects. Brommer (2011) assumes a null  $c/h^2 = 1$ , meaning  
215 that the proportion of phenotypic variance that is due to additive genetic effects is the same  
216 within- and between-populations. We note that this is a conservative estimation of  $c/h^2$  as many  
217 studies to-date assume  $c=1$  and  $h^2=0.5$  (e.g., Ghalambor et al. 2015). In our data, the 95% lower  
218 confidence limit of  $P_{ST}$  exceeds average  $F_{ST}$  at  $c/h^2 > 1$  for both modules B3 (Fig. 5A) and B36  
219 (Fig. 5B). This result is robust to extremely conservative estimates of  $c/h^2 < 1$  (Fig. 5A-B).  
220 Moreover, for most values of  $c/h^2$ ,  $P_{ST}$  exceeds even the upper 95% quantile of  $F_{ST}$  (Fig. 5A-B).  
221 By contrast, 95% confidence intervals for  $P_{ST}$  calculated on the B0 module (which is not  
222 associated with thermogenesis) overlap with  $F_{ST}$  at all values of  $c/h^2$  (Fig. 5C), indicating that  
223 differentiation in expression of this module does not exceed neutral expectations, as expected.  
224  $P_{ST}$  calculated on  $VO_2$  across p0-p10 did not exceed  $F_{ST}$ , except when we restricted it to p10  
225 (Supplementary Fig. 2), the time point under which  $VO_2$  is significantly lower in highlander  
226 compared to lowlanders (Fig. 1A).

227 We found that  $P_{ST}$  on the skeletal muscle module M6 did not exceed neutral expectations:  
228 although observed  $P_{ST}$  does exceed  $F_{ST}$ , lower 95% confidence limits overlap entirely with zero  
229 (Supplemental Fig. S1). We note that  $P_{ST}$  does not tend to overlap with the upper 95% limit of  
230  $F_{ST}$  when we restrict it to p14 (the time point of significant differentiation in module expression  
231 and thermogenic capacity; Figs. 1B and 4B; see Supplemental Fig. S2). This pattern of  
232 phenotypic differentiation is mirrored by  $P_{ST}$  on thermogenic capacity at p14, which greatly  
233 exceeds the upper 95% limit of  $F_{ST}$  at all values of  $c/h^2$  (Supplemental Fig. S2).

234 Finally, we tested whether these candidate  $VO_2$ -associated transcriptional modules were  
235 enriched for genes exhibiting signatures of positive natural selection, as measured by PBS.  
236 Roughly 25% of the genes in modules B3, B36 and M6 contained SNPs with PBS values that  
237 exceeded neutral expectations (Table 3). However, only B36 exhibited a significant enrichment  
238 of outlier SNPs relative to the background rate (Fisher's Exact Test,  $p=0.02$ ; Table 3). This

239 analysis demonstrates that, although all phenotype-associated modules exhibit some proportion  
240 of genes under selection, only B36 contains more than was expected by chance.

## 241 **Discussion**

242 We explored the mechanisms that underlie a developmental delay in the onset of  
243 thermogenesis in juvenile high-altitude deer mice (Fig 1). We show that the developmental  
244 trajectory of the thermoregulatory system has evolved at high altitude *via* selection on the  
245 regulatory systems that control the development of thermo-effector tissues, BAT and skeletal  
246 muscle. Combined with the results of Robertson et al. (2019) and Robertson and McClelland  
247 (2019), our work suggests that the cold hypoxic conditions of high-altitude force an alternative  
248 resource allocation strategy, whereby limited energy is put into developmental processes such as  
249 growth, over the development of the thermoregulatory machinery needed in heat production.

250 *A developmental delay in non-shivering thermogenesis is associated with a delay in expression*  
251 *of fuel supply, oxygenation, and axon guidance pathways in BAT*

252 During early postnatal development mice rely exclusively on BAT for thermogenesis,  
253 and low-altitude pups activate BAT to maintain body temperature in the face of cold by p10. Our  
254 analysis suggests that an ontogenetic delay in the development of non-shivering thermogenesis in  
255 high-altitude deer mice (Fig. 1A) is attributable to a delay in the nervous system innervation and  
256 O<sub>2</sub>/fuel supply lines to a maturing BAT. WGCNA of BAT revealed two transcriptional modules  
257 (B3, B36) that are expressed at higher levels in lowlanders across age, but which show overall  
258 higher expression in both populations (Fig 3). Both modules were significantly correlated with  
259 cold-induced VO<sub>2</sub>, suggesting that changes in the expression of genes in these modules influence  
260 the development of thermogenesis. Module B3 was significantly enriched for pathways involved  
261 in metabolism, particularly fatty acid degradation (Fig. 3; Table S4). This is interesting since fat  
262 is the primary fuel source that powers uncoupling of cellular respiration from ATP production in  
263 non-shivering heat production (Cannon and Nedergaard 2004). Indeed, the β<sub>3</sub> signaling cascade,  
264 initiated by cold, stimulates the lipolysis of fats used in β-oxidation and the eventual uncoupling  
265 of ATP synthesis from electron transport *via* activation of Uncoupling Protein 1 (*Ucp1*).  
266 Although not assigned to B3, we found that expression of *Ucp1* itself was lower in highlanders  
267 compared to lowlanders (ANOVA, main effect of population;  $F_{1,30}=8.2$ ;  $p=0.007$ ).

268 Module B36, by contrast, was enriched for two pathways that are important in O<sub>2</sub>/fuel

269 supply and cold-activation of BAT. For example, enrichment of the vasculature endothelial  
270 growth factor (VEGF) signaling pathway, and downregulation of *Vegfa* in highlanders (Fig 3B),  
271 suggests a reduction in the vascularization of BAT early in the postnatal period in high-altitude  
272 natives. This is notable since the VEGF cascade stimulates angiogenesis, increasing O<sub>2</sub> and  
273 metabolic fuel delivery. Moreover, *Vegfa* itself contains two SNPs above the 99.9% PBS  
274 threshold (Schweizer, Velotta, et al. 2019), suggesting that changes in the VEGF pathway are the  
275 target of selection at high-altitude. We also detected enrichment of the KEGG pathway ‘axon  
276 guidance,’ which represents a key stage in development in which neurons send out axons to  
277 reach their correct targets. Indeed, BAT is activated by the sympathetic nervous system in  
278 response to cold, which leads to the release of norepinephrine and the signaling cascade that  
279 produces heat (Cannon and Nedergaard 2004).

280 A reduction in the expression of genes that participate in axon guidance suggests a  
281 developmental delay in the sympathetic innervation of BAT, which would inhibit recruitment  
282 and activation of this tissue during cold exposure (Robertson et al. 2019). Robertson et al. (2019)  
283 found lower levels of the enzyme tyrosine hydroxylase (TH) in the BAT of high-altitude pups at  
284 p10, lending support to the hypothesis that neurotransmitter synthesis and neural activation of  
285 BAT tissue is delayed in highlanders; TH is the rate-limiting enzyme in norepinephrine  
286 production and is present in sympathetic neurons innervating BAT. Related to the reduced  
287 sympathetic activation of BAT, we found that expression of the gene *calstn3* (*Clstn3*) is  
288 also downregulated in highlanders (ANOVA, main effect of population;  $F_{1,30}=15.1$ ;  $p<0.001$ ).  
289 *Clstn3* is a known promoter of synapse formation; a recent study in house mice found that a  
290 mammalian-specific form (*Clstn3β*) enhances functional sympathetic innervation of BAT (Zeng  
291 et al. 2019).

292 Despite downregulation of genes involved in O<sub>2</sub>/fuel supply and innervation of BAT,  
293 Robertson et al. [2019] found that BAT mass does not differ between highlanders and  
294 lowlanders, and that citrate synthase (a biomarker of mitochondrial abundance) and UCP protein  
295 expression are likewise equivalent. Our results therefore suggest that, although BAT growth and  
296 metabolic potential may be equal in highlanders and lowlanders, a delay in the development of  
297 the innervation and O<sub>2</sub>/fuel supply to BAT may lead an inability of highlanders to respond to  
298 cold temperatures and thus mount an appropriate thermoregulatory response.

299 *A developmental delay in thermogenic capacity is associated with downregulation of energy*  
300 *metabolism pathways in muscle*

301 Transcriptome analysis of gastrocnemius muscle revealed a large transcriptional module  
302 (M6) that closely tracked variation in thermogenic capacity (Fig. 4). These results suggest that  
303 the genes expressed in module M6 may underlie the developmental delay in thermogenesis  
304 beyond p10 (Fig. 1B). The M6 module (Table 2) was enriched for a host of functions related to  
305 skeletal muscle metabolism that reflect changes in its maturation with respect to shivering. Our  
306 analysis suggests that high-altitude mice show a developmental delay in the expression of nearly  
307 all pathways related to ATP generation by mitochondria, including glycolysis, TCA cycle, and  
308 oxidative phosphorylation (Fig 4C). Many of the genes that contribute to functional enrichment  
309 of metabolic pathways were related to the production of mitochondrial respiratory complex I,  
310 including 31 of 35 *Nduf* genes, suggesting that downregulation of metabolic pathways may be  
311 related to a delay in mitochondrial biogenesis. Indeed, the Gene Ontology terms “mitochondria  
312 and mitochondrial part” were also significantly enriched (Table S3).

313 At least two transcription factors that are key regulators of cellular metabolism were  
314 found in module M6 and were expressed at lower levels in highlanders (Fig. 4D-E). Estrogen-  
315 related receptor alpha, *Esrra*, for example, directs the expression of genes involved in  
316 mitochondrial biogenesis (Wu et al. 1999) and mitochondrial energy-producing pathways in  
317 skeletal muscle (Huss et al. 2004). Genes in module M6 were also enriched for *Esrra* binding  
318 sites (Table S3). Lowered expression of peroxisome proliferator activated receptor alpha (*Ppara*)  
319 suggests that fatty acid oxidation may also be depressed in highlanders, since this gene is a major  
320 regulator of fat metabolism capacity; functional terms related to fat oxidation however were not  
321 enriched in this module (Supplemental Table S4). Indeed, (Robertson and McClelland 2019)  
322 found that the  $\beta$ -oxidation enzyme  $\beta$ -hydroxyacyl-CoA dehydrogenase did not track changes in  
323 muscle aerobic capacity of highlanders over these ages. These data provide evidence that the  
324 developmental delay in thermogenic capacity is attributable to a delay in the expression of  
325 pathways that facilitate mitochondrial development and muscle aerobic capacity and allow for  
326 shivering thermogenesis.

327 *Evidence of natural selection*

328 We found that population-level divergence in expression of VO<sub>2</sub>-associated  
329 transcriptional modules exceeded neutral expectations set by genetic differentiation (measured as  
330 genome-wide F<sub>ST</sub>), suggesting that population differences in expression may be adaptive. We  
331 expected that, if population-level divergence in module expression was adaptive, P<sub>ST</sub> on module  
332 eigengene would exceed the upper bounds of the confidence intervals around F<sub>ST</sub>. At nearly  
333 every value of  $c/h^2$ , the lower 95% limit of P<sub>ST</sub> for BAT modules B3 and B36 exceeded average  
334 F<sub>ST</sub> (Fig. 5). Moreover, at the null value of  $c/h^2 = 1$  (Brommer 2011), P<sub>ST</sub> was completely non-  
335 overlapping with the upper 95% quantile of F<sub>ST</sub>, indicating strong population-level  
336 differentiation (Fig. 5 A-B). This finding is consistent with P<sub>ST</sub> on cold-induced VO<sub>2</sub> values at  
337 p10 (Supplemental Fig. S2), the time point of greatest population differentiation (Fig. 1A).  
338 Although P<sub>ST</sub> did not exceed F<sub>ST</sub> for the skeletal muscle module M6 across all time points (p14-  
339 p27), we did find it to exceed neutral expectations when restricted to p14 (Supplemental Fig. S2).  
340 This is consistent with the finding that P<sub>ST</sub> on thermogenic capacity also exceeds the upper 95%  
341 of F<sub>ST</sub> at p14 only (Supplemental Fig. S2). These data together suggest that the delay in the onset  
342 of non-shivering and shivering thermogenesis, and their underlying regulatory control pathways,  
343 may be the target of selection at high-altitude.

344 We note that approximately 25% of genes in candidate modules contain at least one SNP  
345 above the PBS significance threshold (Table 3), and module B36 was significantly enriched for  
346 PBS outliers. Because PBS is polarized by the use of a second lowland population (see  
347 Methods), we can discern that these outlier loci are under positive selection at high-altitude  
348 specifically. Together these results support the interpretation that differentiation in candidate  
349 transcriptional modules, at least within BAT, is driven, in part, by natural selection.

### 350 *Summary and conclusions*

351 We found that a developmental delay in the onset of independent thermoregulatory  
352 ability in deer mice native to high altitude is rooted in a delay in the expression of gene  
353 regulatory networks that contribute to sympathetic innervation of BAT that permits the response  
354 to cold, and in pathways that contribute to aerobic metabolism capabilities of both thermo-  
355 effector organs. Phenotypic divergence analysis suggests that both thermogenic delays and  
356 associated shifts in gene expression in BAT are driven by natural selection. An overabundance of  
357 genes exhibiting signatures of natural selection in BAT module B36 suggests that developmental  
358 changes to genes in this module may be particularly important in high-altitude adaptation. Our

359 results demonstrate that changes to the developmental trajectory of thermoregulation at high-  
360 altitude are the result of regulatory delays in the development of thermo-effector organs, which  
361 limit the ability of high-altitude mice to respond to cold and mount a thermoregulatory response.  
362 Evidence presented here is consistent with the hypothesis that the developmental delay in  
363 thermogenesis at high altitude is attributable to an adaptive energetic trade-off (Robertson et al.  
364 2019; Robertson and McClelland 2019). Although the exact cause is unknown, the combination  
365 of chronic cold and low O<sub>2</sub> availability at high-altitude, coupled with differences in litter size that  
366 should affect competition among siblings for limited resources, may contribute to the altered  
367 energetic conditions that drive this trade-off. Whatever the ultimate cause, our results suggest  
368 that high-altitude pups may benefit from allocating limited resources away from active  
369 thermoregulation, towards other developmental functions such as growth. Because high-altitude  
370 adult deer mice show the opposite pattern (*i.e.*, consistently higher thermogenic capacities,  
371 Cheviron et al. 2013), our combined results suggest that selection pressures at high altitude can  
372 have very different effects on the same physiological system depending on age. Future work on  
373 the selective drivers and energetic benefits of this putatively adaptive energy allocation strategy  
374 will shed further light on adaptive modification of developmental processes to meet the  
375 challenge of selection pressures that vary in strength and magnitude across ontogeny.

## 376 **Materials and Methods**

### 377 *Animals and Experimental Procedures*

378 Deer mice used in this study were the second-generation lab-reared descendants of two  
379 wild populations of *Peromyscus maniculatus* (Robertson et al. 2019; Robertson and McClelland  
380 2019) raised under common garden conditions (24°C, 80 m a.s.l.) at McMaster University of  
381 Ontario, Canada. Individuals from the high-altitude population were trapped at the summit of  
382 Mount Evans in Clear Creek County CO, USA (4,350 m a.s.l.) and the low-altitude population  
383 from Nine-mile prairie, NE, USA (320 m a.s.l.). Altricial rodents, such as deer mice, usually  
384 develop non-shivering thermogenesis (NST) prior to shivering due to the maturation of BAT  
385 which precedes the maturation of skeletal muscle. *P. maniculatus* are only capable of NST after  
386 the first 10 days postpartum (Robertson et al. 2019). In contrast, shivering develops between two  
387 and four weeks after birth (Robertson and McClelland 2019). We sampled BAT and skeletal  
388 muscle (specifically, the gastrocnemius) over these two periods. Briefly, pups were removed  
389 from the nest, then euthanized with an overdose of isoflurane followed by cervical dislocation. In



390 pups ages 0, 2, 4, 6, 8 and 10 days postpartum the intrascapular depot of BAT was blunt  
391 dissected and cleaned of white adipose tissue. In pups aged 14, 21, and 27 days postpartum the  
392 gastrocnemius muscle of the lower hindlimb was bluntly dissected. Tissues were flash frozen and  
393 stored at -80°C.

394 We re-analyzed cold-induced O<sub>2</sub> consumption rate (VO<sub>2</sub>) data from Robertson et al.  
395 (2019) and Robertson and McClelland (2019) for low- and high-altitude native *P. maniculatus*  
396 only, omitting the low altitude congeneric, *P. leucopus*. Briefly, for pups aged 0-10 days  
397 postpartum cold-induced VO<sub>2</sub> was assessed in response to a mild cold stress (10 minutes at  
398 24°C). Pups were compared to a control litter mate who was maintained at 30°C for the same  
399 duration of trial in order to control for handling stress. For pups aged 14-27 days, maximum  
400 cold-induced VO<sub>2</sub> (hereafter, thermogenic capacity) was measured using previously established  
401 methods for adult deer mice (Cheviron et al. 2012). VO<sub>2</sub> max was induced by exposing pups to -  
402 4°C in heliox air (21% O<sub>2</sub> with He). All VO<sub>2</sub> measurements were divided by mass to obtain  
403 mass-specific metabolic rates.

#### 404 ***Transcriptome analyses***

405 We conducted high-throughput sequencing of RNA of BAT and gastrocnemius skeletal  
406 muscle in order to explore the mechanisms that underlie developmental delays in thermogenesis.  
407 Sample size varied from  $n=1-7$  for each population, age, and tissue (see Table S1 in online  
408 supplementary material for full list). We assayed gene expression using TagSeq, a 3' tag-based  
409 sequencing method following Lohman et al. (2016). First, we extracted RNA from <25 mg of  
410 tissue using TRI Reagent (Sigma-Aldrich), then assessed RNA quality using TapeStation  
411 (Agilent Technologies; RIN > 7). The Genome Sequencing and Analysis Facility at the  
412 University of Texas at Austin prepared TagSeq libraries, which were sequenced using Illumina  
413 HiSeq 2500. We filtered raw reads for length, quality, and PCR duplicates following Lohman et  
414 al. (2016) using scripts modified from those available online ([https://github.com/z0on/tag-](https://github.com/z0on/tag-based_RNAseq)  
415 [based\\_RNAseq](https://github.com/z0on/tag-based_RNAseq)). Using the FASTX-toolkit ([http://hannonlab.cshl.edu/fastx\\_toolkit/](http://hannonlab.cshl.edu/fastx_toolkit/)), we cleaned  
416 and trimmed raw reads, which resulted in 3.2 million reads per individual. Filtered reads were  
417 then mapped to the *P. maniculatus* genome (NCBI GCA\_000500345.1 Pman\_1.0) using *bwa*  
418 *mem* (Li and Durbin 2010). We used *featureCounts* (Liao et al. 2014) to generate a table of  
419 transcript abundances. Since genes with low read counts are subject to measurement error  
420 (Robinson and Smyth 2007), we excluded those with less than an average of 10 reads per



421 individual. We retained a total of 11,192 and 11,104 genes after filtering for BAT and skeletal  
422 muscle transcriptomes, respectively. Five outlier samples (one BAT, four skeletal muscle) were  
423 removed following visual inspection of multi-dimensional scaling plots using *plotMDS* in *edgeR*  
424 following Chen et al. (2019).

425 We assessed overall patterns of gene expression among BAT and skeletal muscle  
426 transcripts using Principal Components Analysis (PCA), while weighted gene co-expression  
427 network analysis (WGCNA v. 1.41-1; Langfelder and Horvath 2008) was used to identify  
428 potential regulatory mechanisms that underlie variation in thermogenesis across developmental  
429 time. PCA and WGCNA analyses were conducted separately on BAT and skeletal muscle  
430 samples in R v. 2.5.2 (R Core Team). WGCNA identified clusters of genes with highly  
431 correlated expression profiles (hereafter, modules). This approach was successfully implemented  
432 in recent studies that aimed to relate gene expression with higher-level phenotypes (Plachetzki et  
433 al. 2014; Velotta et al. 2016; Velotta et al. 2018). Prior to performing WGCNA, we normalized  
434 raw read counts by library size and log-transformed them using the functions *calcNormFactors*  
435 and *cpm*, respectively, from the R package *edgeR* (Robinson et al. 2010). Module detection was  
436 performed using the *blockwiseModules* function in WGCNA with *networkType* set to “signed”  
437 (Langfelder and Horvath 2008). Briefly, Pearson correlations of transcript abundance data were  
438 calculated between pairs of genes, after which an adjacency matrix was computed by raising the  
439 correlation matrix to a soft thresholding power of  $\beta = 6$ . Soft thresholding power  $\beta$  is chosen to  
440 achieve an approximately scale free topology, an approach that favors strong correlations (Zhang  
441 and Horvath 2005). We chose a  $\beta$  since it represents the value for which improvement of scale  
442 free topology model fit begins to decrease with increasing thresholding power. A topological  
443 overlap measure was computed from the resulting adjacency matrix for each gene pair.  
444 Topologically-based dissimilarity was then calculated and used as input for average linkage  
445 hierarchical clustering in the creation of cluster dendrograms for both left and right ventricles.  
446 Modules were identified as branches of the resulting cluster tree using the dynamic tree-cutting  
447 method (Langfelder and Horvath 2008). We assigned modules a unique identification according  
448 to tissue (B0-B37 for brown adipose tissue; M0-M7 for skeletal muscle). Genes that could not be  
449 clustered into a module were given the designation B0 and M0 for BAT and skeletal muscle,  
450 respectively.

451           Once modules were defined, we used a multi-step process to associate expression among  
452 individuals with variation in VO<sub>2</sub>. First, we summarized module expression using principal  
453 components analysis (PCA) of gene expression profiles (*blockwiseModules* in WGCNA);  
454 because genes within modules are highly correlated by definition, the first principal component  
455 (referred to as the module eigengene value) was used to represent module expression (Langfelder  
456 and Horvath 2008). We used module eigengene values to test for associations between module  
457 expression and VO<sub>2</sub> for each module (Pearson correlation; *cor* function in WGCNA) in the BAT  
458 network. *P*-values for the correlation were determined by a Student's asymptotic test  
459 (*corPvalueStudent* in WGCNA). For skeletal muscle, association tests were conducted on  
460 population-age means since VO<sub>2</sub> measurements do not exist for the individuals sequenced.  
461 Among phenotype-associated modules, we conducted analysis of variance (ANOVA) on rank-  
462 transformed module eigengene values in order to test for the effects of population, age, and their  
463 interaction on module expression. *P*-values from association tests and ANOVAs were corrected  
464 for multiple testing using the false-discovery rate method.

465           We performed functional enrichment analysis on all modules exhibiting either a  
466 statistical association with VO<sub>2</sub>, or a significant effect in ANOVA, or both, using the R package  
467 *gProfilerR* (Reimand et al. 2016). *Peromyscus maniculatus* gene names were converted to *Mus*  
468 *musculus* gene names using a custom script (Online supplementary material). We corrected for  
469 multiple testing using *gProfilerR*'s native g:SCS algorithm. We used the list of genes from  
470 filtered BAT and gastroc transcriptomes as a custom background list in all enrichment analyses.  
471 We searched for enrichment among terms from Gene Ontology (GO; The Gene Ontology  
472 Consortium 2019), KEGG (Kanehisa and Goto 2000), Reactome (Fabregat et al. 2018), and  
473 WikiPathways (Slenter et al. 2018) databases, as well as transcription factor binding sites from  
474 the TRANSFAC database (Matys et al. 2006).

#### 475 *Tests of phenotypic and genetic divergence*

476           We used two complementary approaches to assess phenotypic and genetic divergence to  
477 test for signatures of natural selection in VO<sub>2</sub>-associated modules. To assess phenotypic  
478 divergence, we calculated P<sub>ST</sub> on module eigengene values following Brommer (2011) using Eq.  
479 (1),

$$480 \quad P_{ST} = \frac{\frac{c}{h^2}\sigma_B^2}{\frac{c}{h^2}\sigma_B^2 + 2\sigma_W^2} \quad (1)$$

481 where  $\sigma_B^2$  denotes between-population phenotypic variance,  $\sigma_W^2$  denotes within-population  
482 phenotypic variance,  $h^2$  the narrow-sense heritability (the proportion of phenotypic variance that  
483 is due to additive genetic effects), and  $c$  a scalar representing the total phenotypic variance due to  
484 additive genetic effects across populations. Within- and between-population variances were  
485 estimated from ANOVA, where module eigengene value were response variables, and postnatal  
486 day, population, and family nested within population were included as main effects. Within-  
487 population variance ( $\sigma_W^2$ ) was calculated as the residual mean squares (MS) from the ANOVA  
488 model. Between-population variance was estimated after Antoniazza et al (2010) following Eq.  
489 (2),

$$490 \quad \sigma_B^2 = \frac{MS_B - MS_W}{n_0} \quad (2)$$

491 where  $MS_B$  and  $MS_W$  are the population effect and the residual mean square variances from the  
492 ANOVA model, respectively, and  $n_0$  a weighted average of sample size based on Sokal and  
493 Rohlf (1995) following Eq. (3).

$$494 \quad n_0 = \frac{(n_1 + n_2) - (n_1^2 + n_2^2)}{n_1 + n_2} \quad (3)$$

495 where  $n_1$  and  $n_2$  are the sample sizes of population one and two, respectively. The ratio  $c/h^2$  was  
496 unknown and could not be readily estimated using our experimental design. As such, we  
497 calculated  $P_{ST}$  across a range of values of  $c/h^2$  from 0 (no heritability) to 2, which is where the  
498 relationship between  $c/h^2$  and  $P_{ST}$  begins to reach asymptote (Brommer 2011; Fig. 5). We  
499 calculated 95% confidence intervals for each value of  $P_{ST}$  calculated across values of  $c/h^2$   
500 ranging from 0-2 at 0.05 level increments (total of 40  $P_{ST}$  estimates).

501  $P_{ST}$  estimates were compared to neutral divergence expectations set by between-  
502 population differentiation. We calculated pairwise genetic differentiation between the lowland  
503 and highland populations using  $F_{ST}$  (estimated with Weir's Theta; Weir and Cockerham 1984)  
504 and previously sequenced exome data (Schweizer, Velotta, et al. 2019). Briefly,  $F_{ST}$  was  
505 calculated for approximately 5 million high-quality bi-allelic single nucleotide polymorphisms  
506 (SNPs) using the '--weir-fst-pop' flag within vcftools v0.1.16 (Danecek et al. 2011). We  
507 compared  $P_{ST}$  of  $VO_2$ -associated modules to that of "Module 0," which contains the suite of  
508 genes that could not be reliably clustered (B0 in BAT; M0 in skeletal muscle). The null  
509 expectation is that  $P_{ST}$  should not exceed the neutral expectation set by  $F_{ST}$  at any value of  $c/h^2$ .  
510 We expected that, if natural selection has shaped shifts in gene expression, then  $P_{ST}$  would

511 exceed  $F_{ST}$  in  $VO_2$ -associated modules, but not in Modules B0 or M0 (which serve as a measure  
512 of background levels of expression differentiation). We calculated  $P_{ST}$  on cold-induced  $VO_2$  (p0-  
513 p10) and thermogenic capacity (p14-p27) as above in order to determine whether these higher  
514 level phenotypic traits were also the targets of natural selection.

515 Finally, we took a population genomic approach to assess whether genes in  $VO_2$ -  
516 associated transcriptional modules exhibit signatures of positive natural selection at high-  
517 altitude. To do this, we re-analyzed Population Branch Statistic (PBS; Yi et al. 2010) data from  
518 (Schweizer, Velotta, et al. 2019). Here, PBS identifies loci that exhibit extreme allele frequency  
519 differences in highland (Mt. Evans) relative to lowland (Lincoln and Merced, CA) populations.  
520 We previously calculated PBS for approximately 5 million exome-wide bi-allelic SNPs, then  
521 calculated the demographically-corrected significance of PBS values using a simulated  
522 distribution of 500,000 SNPs (see Schweizer, Velotta, et al. 2019 for simulation details). We first  
523 determined significant outlier SNPs with a PBS value located above the 99.9% quantile, then  
524 identified those SNPs located within genes belonging to  $VO_2$ -associated modules using  
525 Ensembl's Variant Effect Predictor (McLaren et al. 2010) with the *P. maniculatus* reference  
526 genome annotation data set. We used Fisher's Exact Tests to determine whether thermogenesis-  
527 associated modules were statistically enriched for loci that exceeded the 99.9% threshold.

## 528 **Acknowledgements**

529 We thank Maria Stager and Timothy Moore for help with statistical analyses. Thank you to  
530 Kamilla Bentsen and Madilyn Head for help extracting RNA. Funding to JPV provided by the  
531 National Institutes of Health, National Heart, Lung, and Blood Institute, Research Service Award  
532 Fellowship (1F32HL136124-01). Funding to RMS and ZAC provided by the National Science  
533 Foundation (Postdoctoral Research Fellowship in Biology 1612859 to RMS, IOS-1755411 and  
534 OIA 1736249 to ZAC). Funding to GBM provided by the National Sciences and Engineering  
535 Research Council of Canada (RGPIN 462246-2014).

## 536 **References**

537  
538 Antoniazza S, Burri R, Fumagalli L, Goudet J, Roulin A. 2010. Local adaptation maintains clinal  
539 variation in melanin-based coloration of European barn owls (*Tyto alba*). *Evolution*  
540 64:1944–1954.

- 541 Arjamaa O, Lagerspetz KYH. 1979. Postnatal development of shivering in the mouse. *Journal of*  
542 *Thermal Biology* 4:35–39.
- 543 Beall CM. 2007. Two routes to functional adaptation: Tibetan and Andean high-altitude natives.  
544 *PNAS* 104:8655–8660.
- 545 Bouverot P. 1985. *Adaptation to Altitude-Hypoxia in Vertebrates*. Springer Science & Business  
546 Media
- 547 Brommer JE. 2011. Whither Pst? The approximation of Qst by Pst in evolutionary and  
548 conservation biology. Available from:  
549 <https://onlinelibrary.wiley.com/doi/full/10.1111/j.1420-9101.2011.02268.x>
- 550 Campbell-Staton SC, Bare A, Losos JB, Edwards SV, Cheviron ZA. 2018. Physiological and  
551 regulatory underpinnings of geographic variation in reptilian cold tolerance across a  
552 latitudinal cline. *Molecular Ecology* 27:2243–2255.
- 553 Campbell-Staton SC, Cheviron ZA, Rochette N, Catchen J, Losos JB, Edwards SV. 2017. Winter  
554 storms drive rapid phenotypic, regulatory, and genomic shifts in the green anole lizard.  
555 *Science* 357:495–498.
- 556 Cannon B, Nedergaard J. 2004. Brown adipose tissue: function and physiological significance.  
557 *Physiol. Rev.* 84:277–359.
- 558 Chappell MA, Snyder LR. 1984. Biochemical and physiological correlates of deer mouse alpha-  
559 chain hemoglobin polymorphisms. *PNAS* 81:5484–5488.
- 560 Chen Y, McCarthy DJ, Ritchie M, Robinson M, Smyth GK. 2019. edgeR: differential expression  
561 analysis of digital gene expression data User’s Guide. Available from:  
562 [http://scholar.googleusercontent.com/scholar?q=cache:wKdKwEukm7wJ:scholar.google.com/+edgeR+and+outlier&hl=en&as\\_sdt=0,27](http://scholar.googleusercontent.com/scholar?q=cache:wKdKwEukm7wJ:scholar.google.com/+edgeR+and+outlier&hl=en&as_sdt=0,27)  
563
- 564 Cheviron ZA, Bachman GC, Connaty AD, McClelland GB, Storz JF. 2012. Regulatory changes  
565 contribute to the adaptive enhancement of thermogenic capacity in high-altitude deer  
566 mice. *PNAS* 109:8635–8640.
- 567 Cheviron ZA, Bachman GC, Storz JF. 2013. Contributions of phenotypic plasticity to differences  
568 in thermogenic performance between highland and lowland deer mice. *J. Exp. Biol.*  
569 216:1160–1166.
- 570 Cheviron ZA, Connaty AD, McClelland GB, Storz JF. 2014. Functional genomics of adaptation  
571 to hypoxic cold-stress in high-altitude deer mice: transcriptomic plasticity and  
572 thermogenic performance. *Evolution* 68:48–62.
- 573 Danecek P, Auton A, Abecasis G, Albers CA, Banks E, DePristo MA, Handsaker RE, Lunter G,  
574 Marth GT, Sherry ST, et al. 2011. The variant call format and VCFtools. *Bioinformatics*  
575 27:2156–2158.

- 576 DeBiasse MB, Kelly MW. 2016. Plastic and Evolved Responses to Global Change: What Can  
577 We Learn from Comparative Transcriptomics? *J Hered* 107:71–81.
- 578 Fabregat A, Jupe S, Matthews L, Sidiropoulos K, Gillespie M, Garapati P, Haw R, Jassal B,  
579 Korninger F, May B, et al. 2018. The Reactome Pathway Knowledgebase. *Nucleic Acids*  
580 *Res.* 46:D649–D655.
- 581 Garland T, Carter PA. 1994. Evolutionary Physiology. *Annual Review of Physiology* 56:579–  
582 621.
- 583 Garland T, Losos JB. 1994. Ecological morphology of locomotor performance in squamate  
584 reptiles. In: *Ecological morphology: integrated organismal biology* (Wainwright PC,  
585 Reilly SM, eds). Chicago, IL: Chicago University Press. p. 240–302.
- 586 Ghalambor CK, Hoke KL, Ruell EW, Fischer EK, Reznick DN, Hughes KA. 2015. Non-  
587 adaptive plasticity potentiates rapid adaptive evolution of gene expression in nature.  
588 *Nature* 525:372–375.
- 589 Hayes JP, O'Connor CS. 1999. Natural selection on thermogenic capacity of high-altitude deer  
590 mice. *Evolution* 53:1280–1287.
- 591 Hill RW. 1983. Thermal Physiology and Energetics of *Peromyscus*; Ontogeny, Body  
592 Temperature, Metabolism, Insulation, and Microclimatology. *J Mammal* 64:19–37.
- 593 Huey RB, Stevenson RD. 1979. Integrating thermal physiology and ecology of ectotherms: A  
594 discussion of approaches. *Integr Comp Biol* 19:357–366.
- 595 Huss JM, Torra IP, Staels B, Giguère V, Kelly DP. 2004. Estrogen-related receptor  $\alpha$  directs  
596 peroxisome proliferator-activated receptor  $\alpha$  signaling in the transcriptional control of  
597 energy metabolism in cardiac and skeletal muscle. *Mol Cell Biol* 24:9079–9091.
- 598 Irschick DJ, Garland T. 2001. Integrating function and ecology in studies of adaptation:  
599 Investigations of locomotor capacity as a model system. *Annual Review of Ecology and*  
600 *Systematics* 32:367–396.
- 601 Irschick DJ, Meyers JJ, Husak JF, Galliard J-FL. 2008. How does selection operate on whole-  
602 organism functional performance capacities? A review and synthesis. *Evol. Ecol. Res.*  
603 10:177–197.
- 604 Issemann I, Green S. 1990. Activation of a member of the steroid hormone receptor superfamily  
605 by peroxisome proliferators. *Nature* 347:645–650.
- 606 Ivy CM, Scott GR. 2017. Control of breathing and ventilatory acclimatization to hypoxia in deer  
607 mice native to high altitudes. *Acta Physiol* 221:266–282.
- 608 Kanehisa M, Goto S. 2000. KEGG: Kyoto Encyclopedia of Genes and Genomes. *Nucleic Acids*  
609 *Res* 28:27–30.



- 610 King JA. 1968. Biology of *Peromyscus* (Rodentia). *Biology of Peromyscus* (Rodentia).  
611 [Internet]. Available from: <https://www.cabdirect.org/cabdirect/abstract/19710101319>
- 612 Lagerspetz KYH. 1966. Postnatal development of thermoregulation in laboratory mice.  
613 *Helgoländer wissenschaftliche Meeresuntersuchungen* 14.
- 614 Lailvaux SP, Husak JF. 2014. The life history of whole-organism performance. *The Quarterly*  
615 *Review of Biology* 89:285–318.
- 616 Langfelder P, Horvath S. 2008. WGCNA: an R package for weighted correlation network  
617 analysis. *BMC Bioinformatics* 9:559.
- 618 Lau DS, Connaty AD, Mahalingam S, Wall N, Cheviron ZA, Storz JF, Scott GR, McClelland  
619 GB. 2017. Acclimation to hypoxia increases carbohydrate use during exercise in high-  
620 altitude deer mice. *American Journal of Physiology-Regulatory, Integrative and*  
621 *Comparative Physiology* 312:R400–R411.
- 622 Li H, Durbin R. 2010. Fast and accurate long-read alignment with Burrows-Wheeler transform.  
623 *Bioinformatics* 26:589–595.
- 624 Liao Y, Smyth GK, Shi W. 2014. featureCounts: an efficient general purpose program for  
625 assigning sequence reads to genomic features. *Bioinformatics* 30:923–930.
- 626 Lohman BK, Weber JN, Bolnick DI. 2016. Evaluation of TagSeq, a reliable low-cost alternative  
627 for RNAseq. *Mol Ecol Resour*:n/a-n/a.
- 628 Lui MA, Mahalingam S, Patel P, Connaty AD, Ivy CM, Cheviron ZA, Storz JF, McClelland GB,  
629 Scott GR. 2015. High-altitude ancestry and hypoxia acclimation have distinct effects on  
630 exercise capacity and muscle phenotype in deer mice. *Am. J. Physiol. Regul. Integr.*  
631 *Comp. Physiol.* 308:R779–R791.
- 632 Mahalingam S, McClelland GB, Scott GR. 2017. Evolved changes in the intracellular  
633 distribution and physiology of muscle mitochondria in high-altitude native deer mice.  
634 *The Journal of Physiology* 595:4785–4801.
- 635 Matys V, Kel-Margoulis OV, Fricke E, Liebich I, Land S, Barre-Dirrie A, Reuter I, Chekmenev  
636 D, Krull M, Hornischer K, et al. 2006. TRANSFAC® and its module TRANSCompel®:  
637 transcriptional gene regulation in eukaryotes. *Nucleic Acids Res* 34:D108–D110.
- 638 McLaren W, Pritchard B, Rios D, Chen Y, Flicek P, Cunningham F. 2010. Deriving the  
639 consequences of genomic variants with the Ensembl API and SNP Effect Predictor.  
640 *Bioinformatics* 26:2069–2070.
- 641 Nikel KE, Shanishchara NK, Ivy CM, Dawson NJ, Scott GR. 2018. Effects of hypoxia at  
642 different life stages on locomotory muscle phenotype in deer mice native to high  
643 altitudes. *Comparative Biochemistry and Physiology Part B: Biochemistry and Molecular*  
644 *Biology* 224:98–104.



- 645 Pembrey MS. 1895. The effect of variations in external temperature upon the output of carbonic  
646 acid and the temperature of young animals. *J Physiol* 18:363–379.
- 647 Plachetzki DC, Pankey MS, Johnson BR, Ronne EJ, Kopp A, Grosberg RK. 2014. Gene co-  
648 expression modules underlying polymorphic and monomorphic zooids in the colonial  
649 hydrozoan, *Hydractinia symbiolongicarpus*. *Integr. Comp. Biol.*:icu080.
- 650 Reimand J, Arak T, Adler P, Kolberg L, Reisberg S, Peterson H, Vilo J. 2016. g:Profiler—a web  
651 server for functional interpretation of gene lists (2016 update). *Nucl. Acids Res.* 44:W83–  
652 W89.
- 653 Robertson CE, McClelland GB. 2019. Postnatal maturation of skeletal muscle drives adaptive  
654 thermogenic capacity of high-altitude deer mice, *Peromyscus maniculatus*. *Journal of*  
655 *Experimental Biology*.
- 656 Robertson CE, Tattersall GJ, McClelland GB. 2019. Development of homeothermic endothermy  
657 is delayed in high-altitude native deer mice (*Peromyscus maniculatus*). *Proceedings of*  
658 *the Royal Society B: Biological Sciences* 286:20190841.
- 659 Robinson MD, McCarthy DJ, Smyth GK. 2010. edgeR: a Bioconductor package for differential  
660 expression analysis of digital gene expression data. *Bioinformatics* 26:139–140.
- 661 Robinson MD, Smyth GK. 2007. Moderated statistical tests for assessing differences in tag  
662 abundance. *Bioinformatics* 23:2881–2887.
- 663 Schweizer RM, Velotta JP, Ivy CM, Jones MR, Muir SM, Bradburd GS, Storz JF, Scott GR,  
664 Cheviron ZA. 2019. Physiological and genomic evidence that selection on the  
665 transcription factor *Epas1* has altered cardiovascular function in high-altitude deer mice.  
666 *PLOS Genetics* 15:e1008420–e1008420.
- 667 Scott GR, Elogio TS, Lui MA, Storz JF, Cheviron ZA. 2015. Adaptive modifications of muscle  
668 phenotype in high-altitude deer mice are associated with evolved changes in gene  
669 regulation. *Mol. Biol. Evol.* 32:1962–1976.
- 670 Simonson TS, McClain DA, Jorde LB, Prchal JT. 2011. Genetic determinants of Tibetan high-  
671 altitude adaptation. *Hum Genet* 131:527–533.
- 672 Slenter DN, Kutmon M, Hanspers K, Riutta A, Windsor J, Nunes N, Mélius J, Cirillo E, Coort  
673 SL, Digles D, et al. 2018. WikiPathways: a multifaceted pathway database bridging  
674 metabolomics to other omics research. *Nucleic Acids Res* 46:D661–D667.
- 675 Snyder LRG. 1981. Deer mouse hemoglobins: is there genetic adaptation to high altitude?  
676 *BioScience* 31:299–304.
- 677 Snyder LRG, Born S, Lechner AJ. 1982. Blood oxygen affinity in high- and low-altitude  
678 populations of the deer mouse. *Resp. Physiol.* 48:89–105.
- 679 Sokal RR, Rohlf FJ. 1995. *Biometry*. 3rd ed. New York, NY: W.H.H.H Freeman and Company

- 680 Storz JF. 2007. Hemoglobin Function and Physiological Adaptation to Hypoxia in High-Altitude  
681 Mammals. *J. Mammal.* 88:24–31.
- 682 Storz JF. 2016. Hemoglobin–oxygen affinity in high-altitude vertebrates: is there evidence for an  
683 adaptive trend? *Journal of Experimental Biology* 219:3190–3203.
- 684 Storz JF, Scott GR, Cheviron ZA. 2010. Phenotypic plasticity and genetic adaptation to high-  
685 altitude hypoxia in vertebrates. *J Exp Biol* 213:4125–4136.
- 686 Tate KB, Ivy CM, Velotta JP, Storz JF, McClelland GB, Cheviron ZA, Scott GR. 2017.  
687 Circulatory mechanisms underlying adaptive increases in thermogenic capacity in high-  
688 altitude deer mice. *Journal of Experimental Biology* 220:3616–3620.
- 689 Velotta JP, Jones J, Wolf CJ, Cheviron ZA. 2016. Transcriptomic plasticity in brown adipose  
690 tissue contributes to an enhanced capacity for nonshivering thermogenesis in deer mice.  
691 *Mol Ecol* 25:2870–2886.
- 692 Velotta JP, McCormick SD, Jones AW, Schultz ET. 2018. Reduced Swimming Performance  
693 Repeatedly Evolves on Loss of Migration in Landlocked Populations of Alewife.  
694 *Physiological and Biochemical Zoology* 91:814–825.
- 695 Velotta JP, Wegrzyn JL, Ginzburg S, Kang L, Czesny S, O’Neill RJ, McCormick SD, Michalak  
696 P, Schultz ET. 2017. Transcriptomic imprints of adaptation to fresh water: parallel  
697 evolution of osmoregulatory gene expression in the Alewife. *Mol Ecol* 26:831–848.
- 698 Weir BS, Cockerham CC. 1984. Estimating F-Statistics for the Analysis of Population Structure.  
699 *Evolution* 38:1358–1370.
- 700 Whitehead A. 2012. Comparative genomics in ecological physiology: toward a more nuanced  
701 understanding of acclimation and adaptation. *J. Exp. Biol.* 215:884–891.
- 702 Wu Z, Puigserver P, Andersson U, Zhang C, Adelmant G, Mootha V, Troy A, Cinti S, Lowell B,  
703 Scarpulla RC, et al. 1999. Mechanisms controlling mitochondrial biogenesis and  
704 respiration through the thermogenic coactivator PGC-1. *Cell* 98:115–124.
- 705 Yi X, Liang Y, Huerta-Sanchez E, Jin X, Cuo ZXP, Pool JE, Xu X, Jiang H, Vinckenbosch N,  
706 Korneliussen TS, et al. 2010. Sequencing of 50 Human Exomes Reveals Adaptation to  
707 High Altitude. *Science* 329:75–78.
- 708 Zeng X, Ye M, Resch JM, Jedrychowski MP, Hu B, Lowell BB, Ginty DD, Spiegelman BM.  
709 2019. Innervation of thermogenic adipose tissue via a calyntenin 3 $\beta$ –S100b axis. *Nature*  
710 569:229.
- 711 Zhang B, Horvath S. 2005. A general framework for weighted gene co-expression network  
712 analysis. *Statistical Applications in Genetics and Molecular Biology* [Internet] 4.  
713 Available from:  
714 [http://www.degruyter.com/view/j/sagmb.2005.4.1/sagmb.2005.4.1.1128/sagmb.2005.4.1.](http://www.degruyter.com/view/j/sagmb.2005.4.1/sagmb.2005.4.1.1128/sagmb.2005.4.1.1128.xml)  
715 1128.xml

**Table 1.** Brown adipose tissue modules significantly correlated with cold-induced VO<sub>2</sub>. Full association test results are presented in Supplementary Table S3. Effect of population (highland vs. lowland), age (postnatal day p0-p10), or their interaction from ANOVA models on rank-transformed module expression values (module eigengene values). Final two columns present results of Pearson correlation between module expression and cold-induced VO<sub>2</sub>. *P*-values from association tests and ANOVAs were corrected for multiple testing using the false-discovery rate method.

| Module | Module size | Population        |                  | Age               |                  | Pop x Age         |          | VO <sub>2</sub> correlation |                  |
|--------|-------------|-------------------|------------------|-------------------|------------------|-------------------|----------|-----------------------------|------------------|
|        |             | F <sub>1,30</sub> | <i>P</i>         | F <sub>1,30</sub> | <i>P</i>         | F <sub>1,30</sub> | <i>P</i> | <i>r</i>                    | <i>P</i>         |
| B2     | 1022        | 7.4               | 0.41             | 3.2               | 1.0              | 5.36              | 1.0      | -0.49                       | <b>0.02</b>      |
| B3     | 773         | 27.0              | <b>&lt;0.001</b> | 20.8              | <b>&lt;0.001</b> | 1.67              | 1.0      | 0.67                        | <b>&lt;0.001</b> |
| B4     | 252         | 18.6              | <b>0.01</b>      | 38.1              | <b>&lt;0.001</b> | 0.43              | 1.0      | -0.56                       | <b>0.004</b>     |
| B11    | 99          | 162.1             | <b>&lt;0.001</b> | 26.8              | <b>&lt;0.001</b> | 0.04              | 1.0      | -0.47                       | <b>0.02</b>      |
| B12    | 605         | 21.5              | <b>&lt;0.001</b> | 128.2             | <b>&lt;0.001</b> | 4.90              | 1.0      | -0.81                       | <b>&lt;0.001</b> |
| B16    | 149         | 2.7               | 1.0              | 25.9              | <b>&lt;0.001</b> | 0.06              | 1.0      | -0.55                       | <b>0.01</b>      |
| B32    | 267         | 0.1               | 1.0              | 32.9              | <b>&lt;0.001</b> | 0.36              | 1.0      | -0.52                       | <b>0.01</b>      |
| B33    | 1073        | 0.7               | 1.0              | 53.9              | <b>&lt;0.001</b> | 0.85              | 1.0      | 0.64                        | <b>&lt;0.001</b> |
| B35    | 74          | 37.3              | <b>&lt;0.001</b> | 0.9               | 1.0              | 0.02              | 1.0      | -0.45                       | <b>0.03</b>      |
| B36    | 708         | 26.5              | <b>&lt;0.001</b> | 51.5              | <b>&lt;0.001</b> | 1.52              | 1.0      | 0.58                        | <b>&lt;0.001</b> |

**Table 2.** Association-test and ANOVA results on skeletal muscle modules. Effect of population (highland vs. lowland), ontogenetic age (postnatal day p14-p27), or their interaction on rank-transformed module expression (module eigengene values) is presented. Final two columns present results of Pearson correlation between module expression and thermogenic capacity. Note that correlations were performed on population-age means since VO<sub>2</sub> measurements did not exist for the individuals sequenced. *P*-values from association tests and ANOVAs were corrected for multiple testing using the false-discovery rate method.

| Module | Module size | Population        |          | Age               |          | Pop x Age         |          | VO <sub>2</sub> correlation |              |
|--------|-------------|-------------------|----------|-------------------|----------|-------------------|----------|-----------------------------|--------------|
|        |             | F <sub>1,22</sub> | <i>P</i> | F <sub>1,22</sub> | <i>P</i> | F <sub>1,22</sub> | <i>P</i> | <i>r</i>                    | <i>P</i>     |
| M1     | 92          | 3.4               | 0.6      | 15.0              | 0.006    | 2.4               | 1        | 0.18                        | 0.99         |
| M2     | 2654        | 1.0               | 1        | 150.5             | <0.001   | 0.3               | 1        | -0.94                       | <b>0.02</b>  |
| M3     | 1052        | 11.9              | 0.02     | 1.8               | 1        | 2.3               | 1        | -0.79                       | 0.15         |
| M4     | 288         | 97.8              | <0.001   | 8.7               | 0.06     | 1.7               | 1        | 0.0002                      | 0.99         |
| M5     | 168         | 4.6               | 0.4      | 3.5               | 0.61     | 4.4               | 0.4      | 0.19                        | 0.99         |
| M6     | 2878        | 3.2               | 0.7      | 64.4              | <0.001   | 0.1               | 1        | 0.98                        | <b>0.004</b> |
| M7     | 443         | 91.1              | <0.001   | 7.2               | 0.11     | 1.0               | 1        | 0.07                        | 0.99         |

**Table 3.** Number and proportion of genes in candidate modules containing outlier SNPs (PBS > 99.9% quantile of the simulated distribution). P-values obtained from Fisher's Exact Tests

| <b>Module</b> | <b>No. outlier genes</b> | <b>Total genes</b> | <b>% outlier genes</b> | <b><i>p</i>-value</b> |
|---------------|--------------------------|--------------------|------------------------|-----------------------|
| B3            | 184                      | 773                | 23.8%                  | 0.7                   |
| B36           | 196                      | 708                | 27.7%                  | 0.02                  |
| M6            | 631                      | 2878               | 21.9%                  | 1                     |

**Figure 1.** The development of thermogenesis is delayed in highland (blue) related to lowland (orange) deer mice. (A) Cold (24°C)-induced O<sub>2</sub> consumption rate (VO<sub>2</sub>) across postnatal day p2-p10. Values constitute the difference between cold-induced and normothermic VO<sub>2</sub>, which controls for the stress of separating pups from their mothers at a young age. Values crossing zero indicates that pups are able to generate heat independently. (B) Thermogenic capacity (VO<sub>2</sub> max during exposure to 5°C in heliox) under normoxia is significantly lower in highlanders than lowlanders at p14. Values represent mean mass-corrected VO<sub>2</sub>. \*p<0.05; \*\*p<0.01. Data from Robertson et al. 2019 (A) and Robertson and McClelland 2019 (B).

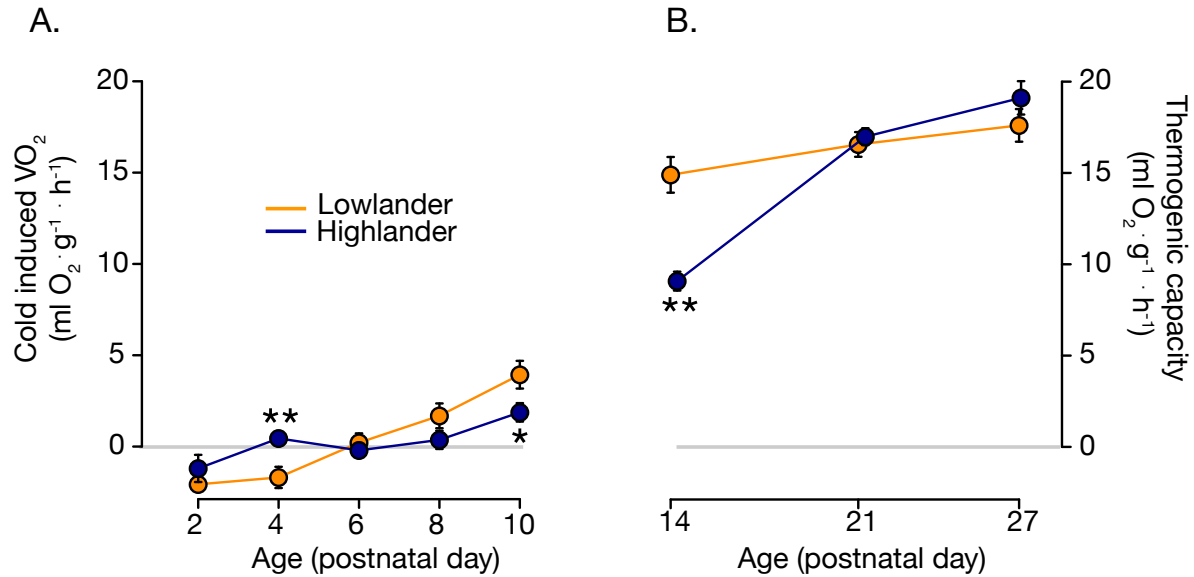

**Figure 2.** Principal components analysis (PCA) transcriptome expression data for thermo-effector organs brown adipose tissue and (A) skeletal muscle (B) in lowland (orange points) and highland (blue points) deer mice. Symbols represents ages from postnatal day p0-p10 for brown adipose tissue, and p14-p27 in skeletal muscle. Populations separated along PC1 in brown adipose tissue data and PC2 in skeletal muscle data. Grey circles are 95% confidence ellipses drawn around each population to highlight separation.

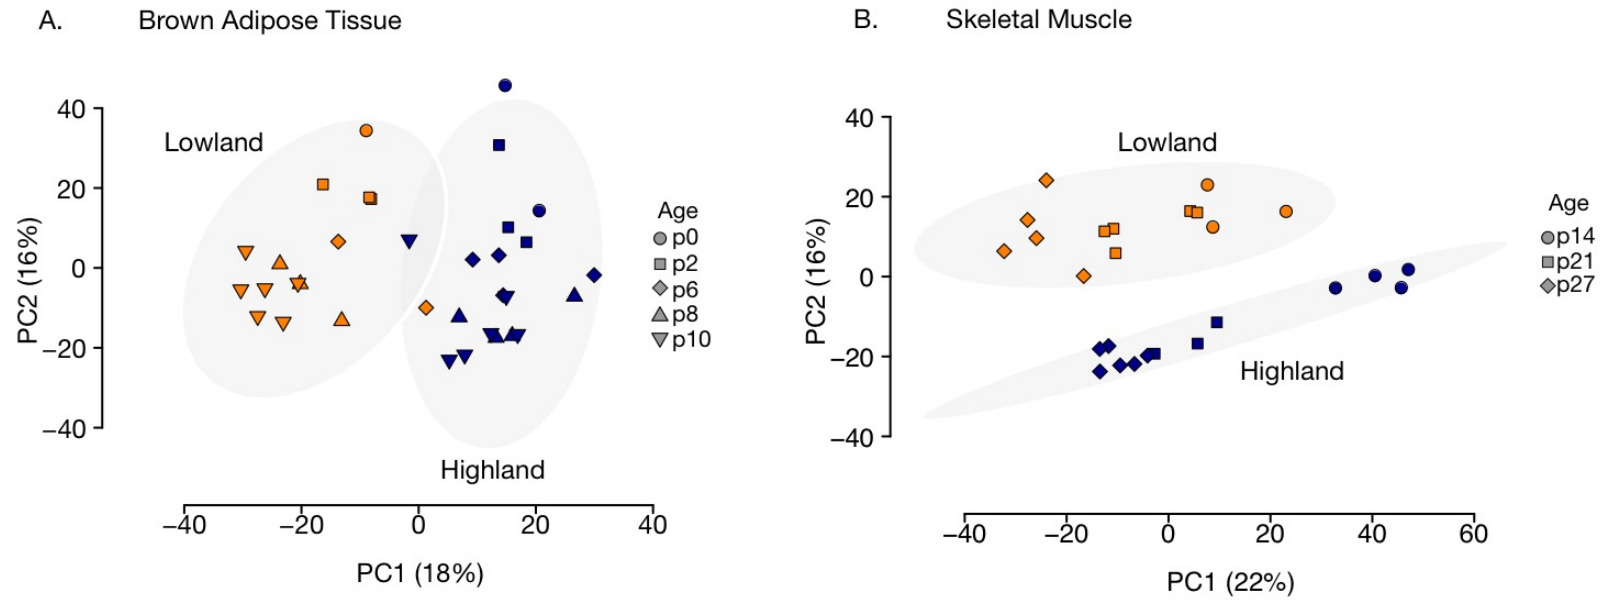



**Figure 3.** Two brown adipose tissue modules are associated with variation in thermogenesis in p0-p10 deer mouse pups. (A-B): panels show the significant positive association between module eigengene and cold-induced VO<sub>2</sub> (measure of thermogenesis). Eigengene values of modules B3 (C) and B36 (D) are significantly affected by age, and significantly differentiated between lowland (orange) and highland (blue) populations. We detected significant enrichment of KEGG pathways related to metabolism and fatty acid degradation in B3 (E), and VEGF signaling and axon guidance in B36, among others (F). Values in (E-F) are the negative log of the enrichment test *p*-value after correction for multiple testing using the g:SCS algorithm in *gProfilerR* (Reimend et al. 2016). Inset in (F) shows average expression (log counts per million; cpm) across age for *Vegfa* in lowlanders (orange) vs. highlanders (blue). \*\*\* *p*<0.001. See Table S3 for full functional enrichment analysis results.

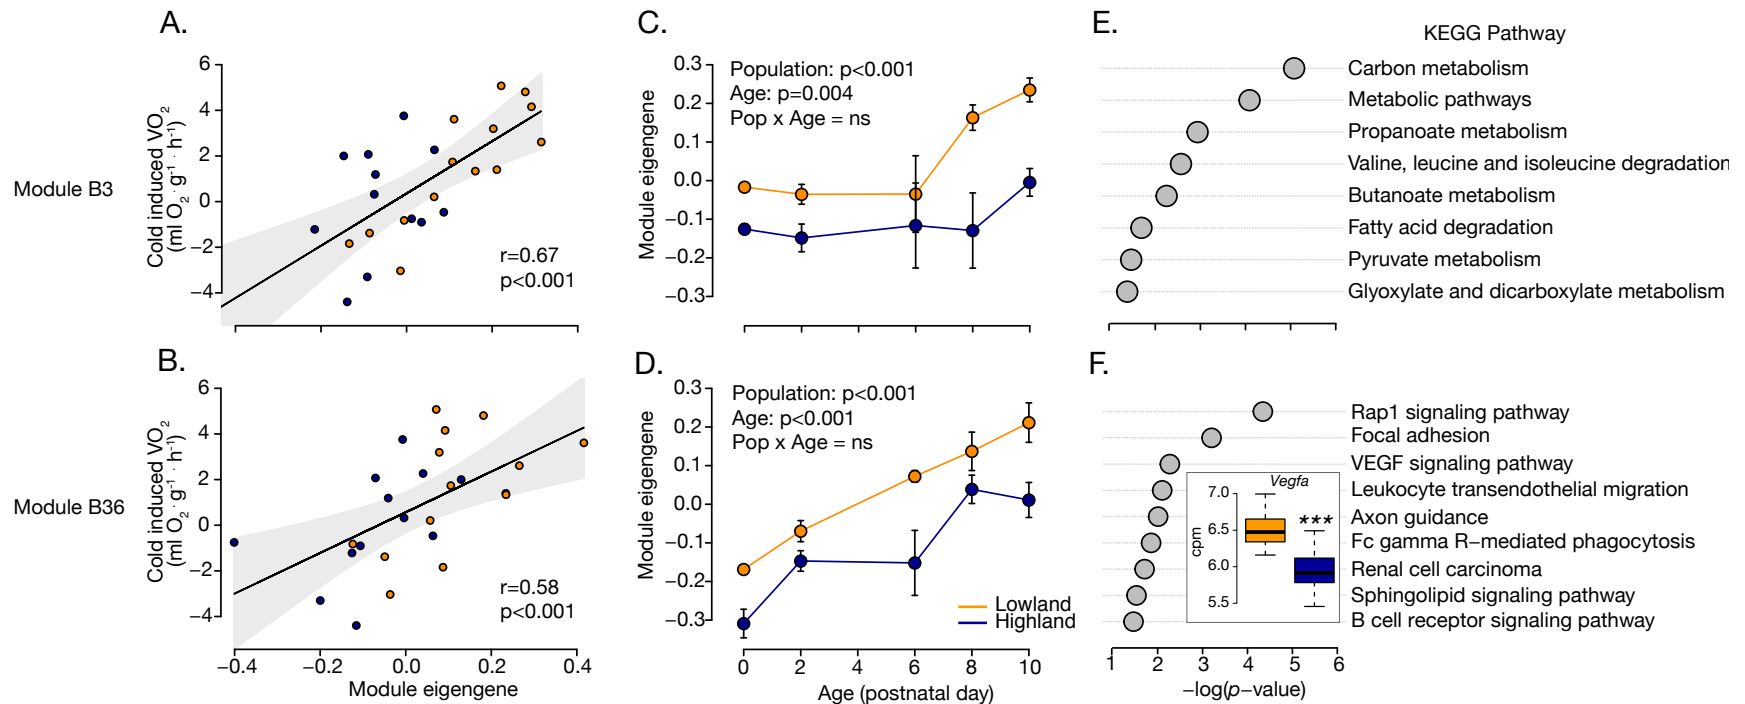

**Figure 4.** Skeletal muscle module M6 is significantly associated with thermogenic capacity in lowland (orange) and highland (blue) deer mice aged p14-p27. (A) Module expression is positively correlated with thermogenic capacity at the population/age level (individual level data not available). (B) Highland deer mice exhibit significantly lower module eigengene values at postnatal day p14 (\*\*  $p < 0.01$ ), and no differences in expression at p21 or p27. (C) Functional enrichment analysis reveals enrichment of KEGG pathways involved in aerobic metabolism and thermogenesis among others. Values are the negative log of the enrichment test  $p$ -value after correction for multiple testing using the g:SCS algorithm in *gProfilerR* (Reimend et al. 2016). Expression values (log counts per million; cpm) for the transcription factors *Esrra* (D) and *Ppara* (E) at p14 are lower for highlanders compared to lowlanders; both transcription factors are involved in the regulation of mitochondrial biogenesis and metabolic pathways.

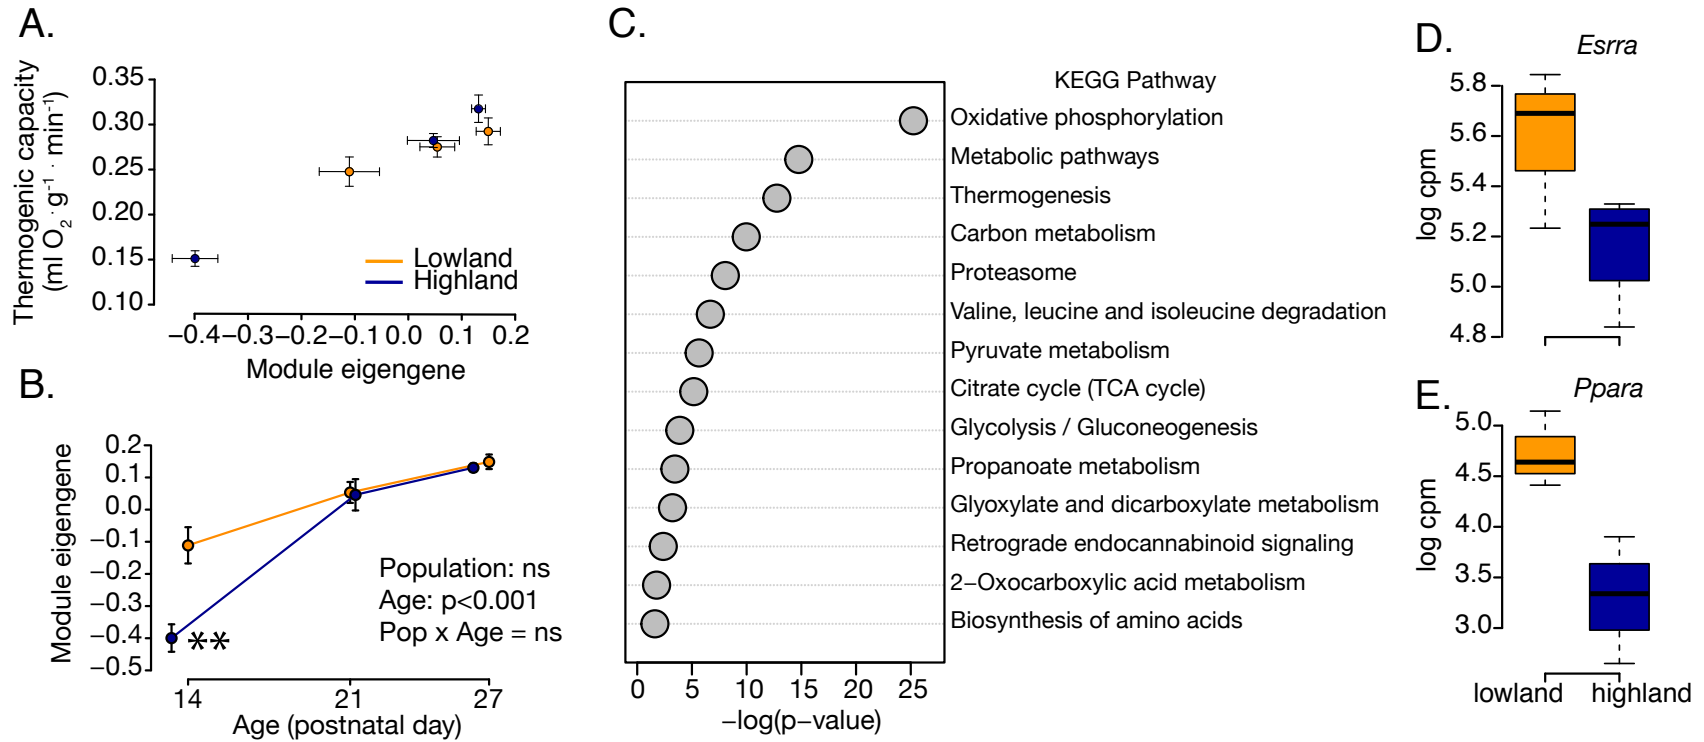

**Figure 5.**  $P_{ST}$  on module expression values for brown adipose tissue modules B0 (A), B3 (B), and B36 (C), which constitutes a suite of uncorrelated genes.  $P_{ST}$  values were calculated across a range of  $c/h^2$  values from 0-2. Grey polygons represent 95% confidence limits on  $P_{ST}$  generated from bootstrapping. Average  $F_{ST}$  and the upper 95% quantile of  $F_{ST}$  are shown. For nearly every value of  $P_{ST}$  for modules B3 and B36, but not B0, the lower confidence limit of  $P_{ST}$  of module expression is non-overlapping with  $F_{ST}$ .

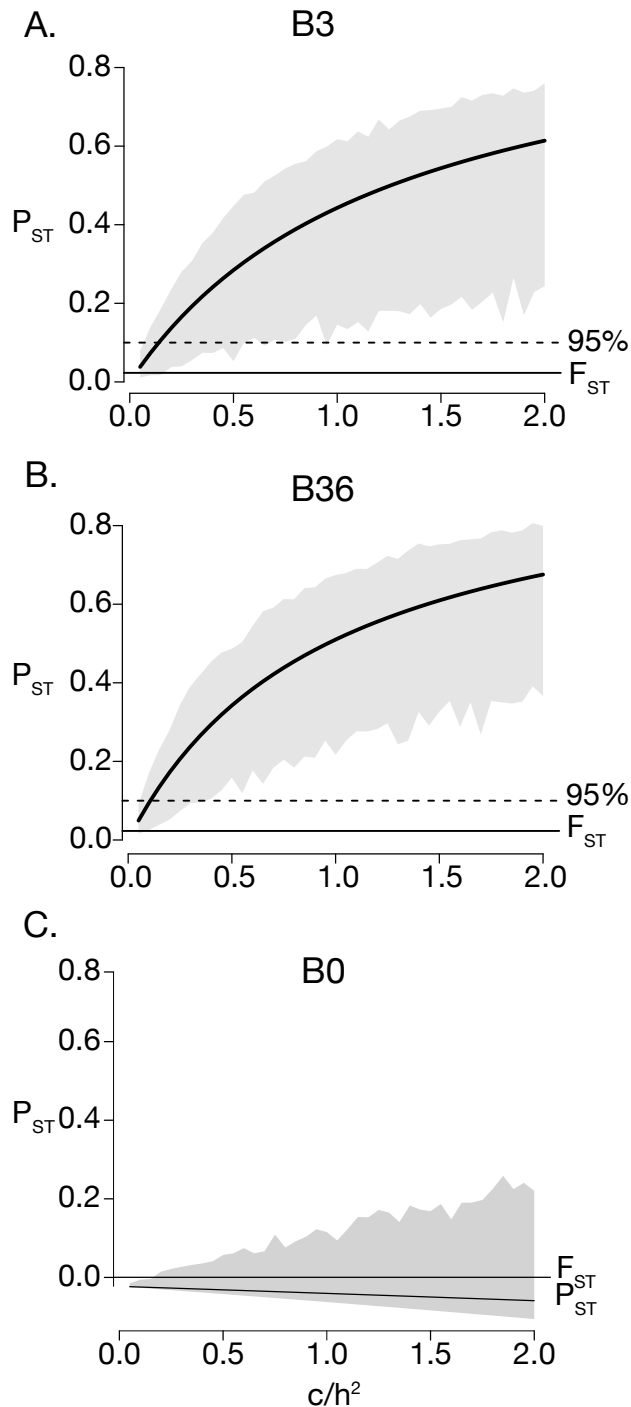

## Supplementary Material

**Table S1.** Sample sizes for tag-seq analysis after outlier removal (see Methods).

|          | p0 | p2 | p6 | p8 | p10 | p14 | p21 | p27 |
|----------|----|----|----|----|-----|-----|-----|-----|
| Lowland  | 2  | 4  | 4  | 4  | 6   | 3   | 3   | 5   |
| Highland | 1  | 2  | 2  | 3  | 6   | 4   | 5   | 6   |

**Table S2.** Table of all genes expressed in brown adipose tissue (BAT) and skeletal muscle and their module assignments using WGCNA. Modules were given color name identifiers by WGCNA, which were converted into numbered identifiers (B# for brown adipose tissue; M# for skeletal muscle). Gene names derived from the *Peromyscus maniculatus* genome Annotation Release 100.

**Table S3.** ANOVA and association analysis results for BAT modules. Table presents F-values and false-discovery rate corrected *p*-values for main effects of population, postnatal age, and their interaction from the ANOVA on rank-transformed module expression values. Pearson correlation coefficients and false-discovery rate corrected *p*-values for the association between VO<sub>2</sub> and module expression are also presented.

**Table S4.** Results of *gProfiler* functional enrichment analysis of phenotype-associated BAT and skeletal muscle WGCNA modules. Source represents whether terms were identified in the Gene Ontology (GO) database (BP: Biological Process, CC: Cellular Component, MF: Molecular Function), Kyoto Encyclopedia of Genes and Genomes (KEGG) pathways, Reactome pathways (REAC), Wikipathways (WP), or transcription factor binding sites identified in the TRANSFAC TFBS database (TF). ‘Adjusted\_p\_value’ is the corrected *p*-value for the enrichment analysis - we corrected for multiple testing using *gProfiler*’s native g:SCS algorithm. ‘Term\_size’ represents the number of genes in each functional category term, while ‘query\_size’ represents the number of searchable genes in each module. The column ‘intersections’ lists the gene query names associated with each term. Modules without reported terms had none significantly enriched at *p* > 0.05 after correction for multiple testing.

**Figure S1.**  $P_{ST}$  on module expression values for skeletal muscles modules M6 (A), and M0, which constitutes the suite of uncorrelated genes.  $P_{ST}$  values were calculated across a range of  $c/h^2$  values from 0-2. Grey polygons represent 95% confidence limits on  $P_{ST}$  generated from bootstrapping. Average  $F_{ST}$  and the upper 95% quantile of  $F_{ST}$  are shown.

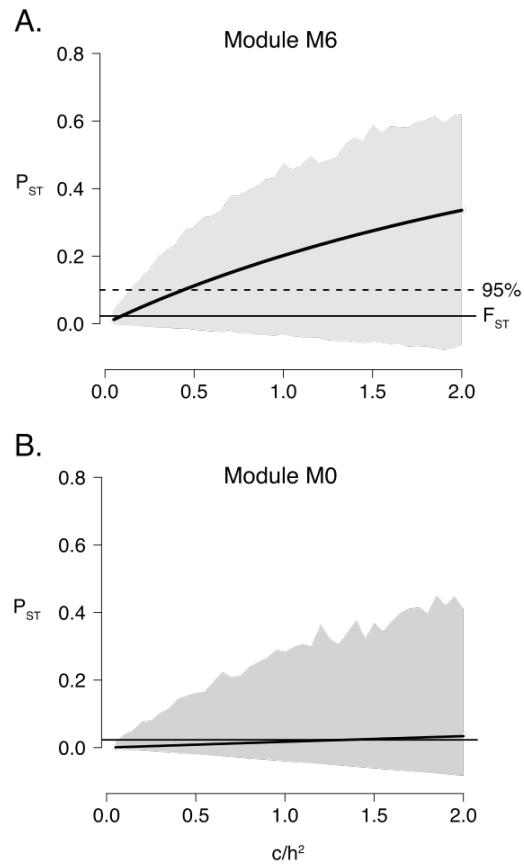

**Figure S2.**  $P_{ST}$  on cold-induced  $VO_2$  (A) and thermogenic capacity data (D) at the time point of greatest population differentiation (p10 and p14, respectively). Also plotted is  $P_{ST}$  on candidate module eigengene values B3 (B), B36 (C), and M6 (E) for at the same time points.  $P_{ST}$  values were calculated across a range of  $c/h^2$  values from 0-2. Grey polygons represent 95% confidence limits on  $P_{ST}$  generated from bootstrapping. Average  $F_{ST}$  and the upper 95% quantile of  $F_{ST}$  are shown.

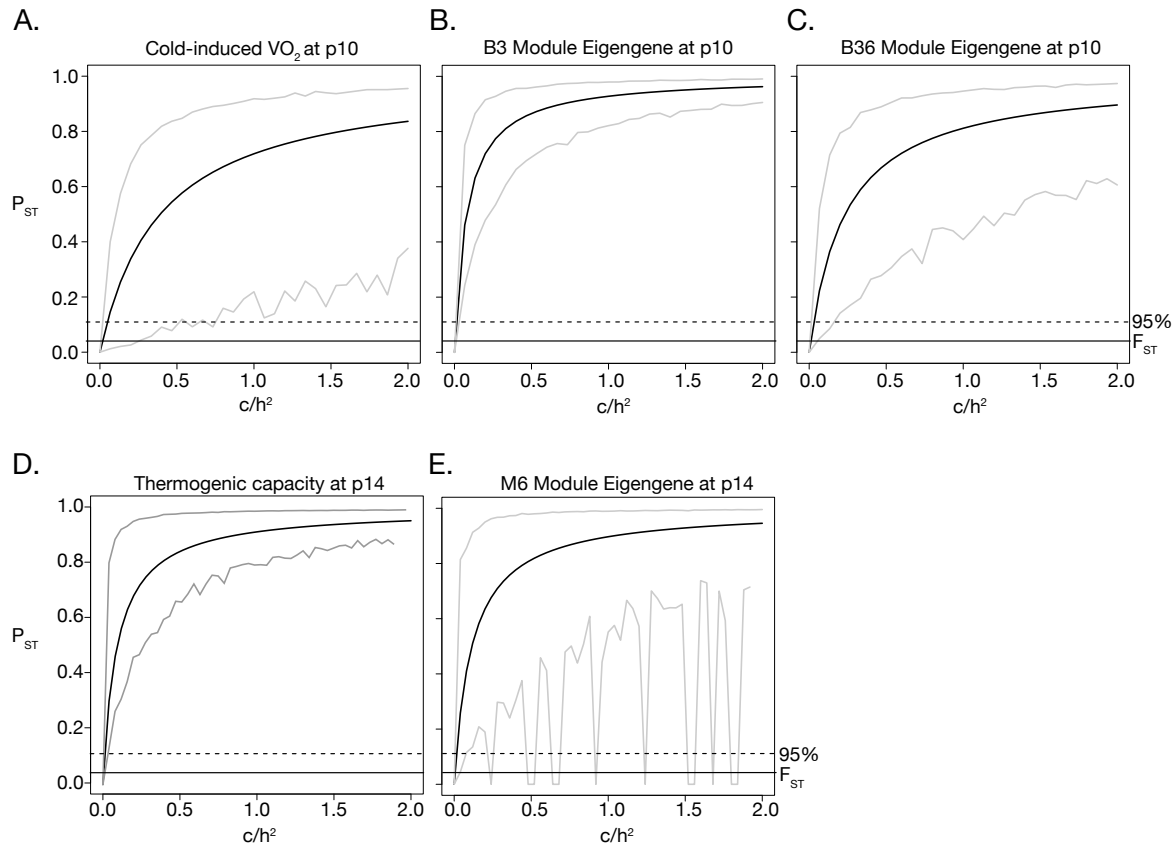

Source: https://biorxiv.org/content/10.1101/2019.12.17.880112v1.full.pdf
